# Supplementary material for: Transcriptomic Drivers of Differentiation, Maturation, and Polyploidy in Human Extravillous Trophoblast
Source: Frontiers journal article supplement (doi:10.3389/fcell.2021.702046), 2021-09-03

A

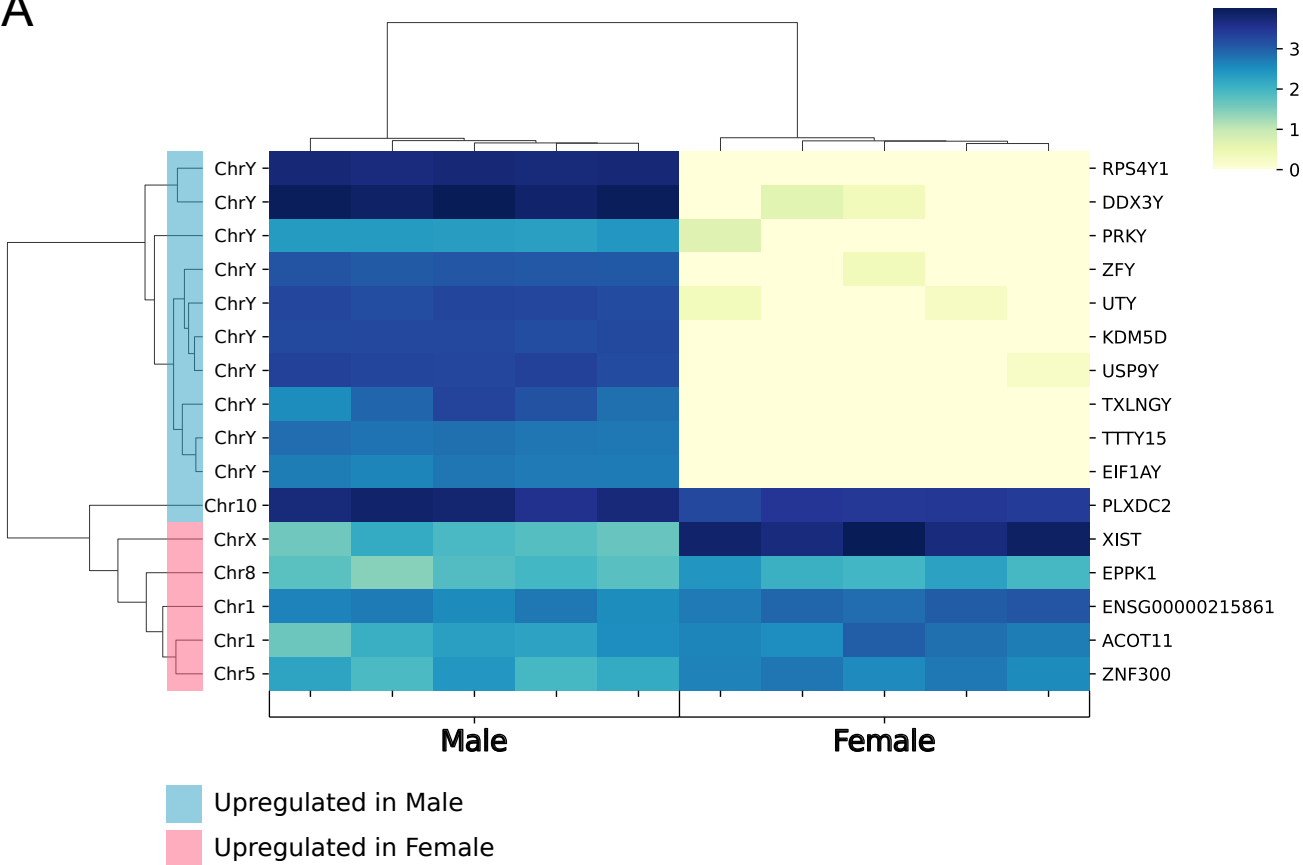

# B

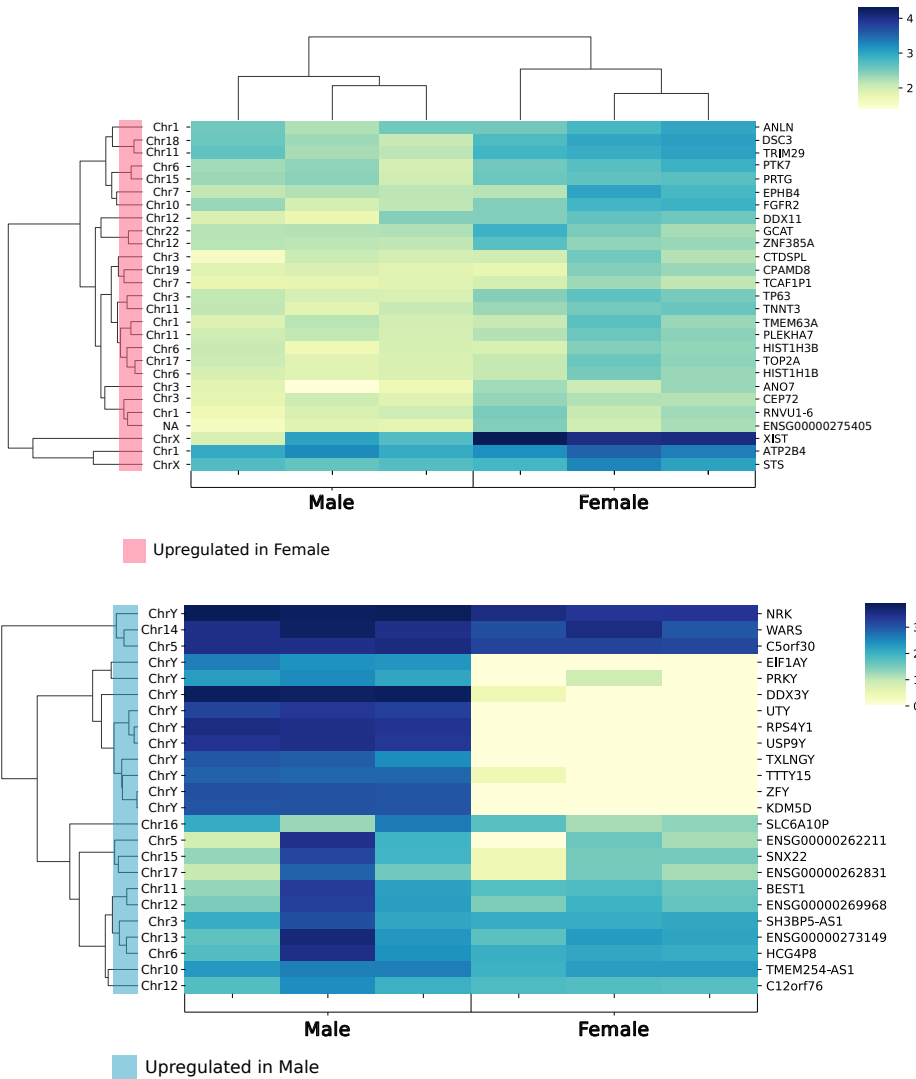

Supplement: Data_Sheet_2.PDF [file Data_Sheet_2.PDF]
