# Supplementary material for: Transcriptomic Drivers of Differentiation, Maturation, and Polyploidy in Human Extravillous Trophoblast
Source: Front Cell Dev Biol. 2021 Sep 3;9:702046. doi: 10.3389/fcell.2021.702046 (PMC8446284; doi:10.3389/fcell.2021.702046)
Supplement: Supplementary Table 1 — Details of all samples used in study. CTB, cytotrophoblast; EVT, extravillous trophoblast; MSC, umbilical cord-derived mesenchymal stem cells; and TSC, trophoblast stem cells (derived from first trimester placentae). [file Table_1.xlsx]

## Sheet: Sheet1
Patient Number	Cell Type	Trimester	Gestational Age (wksday)	Fetal Sex	RNA-seq	scCNV	Ploidy Analysis by Flow Cytometry	FISH	Genotyping Array
716	CTB	1	114	Female	X
788	CTB	1	126	Female	X
793	CTB	1	100	Female	X
804	CTB	1	106	Female	X
805	CTB	1	112	Female	X
822	CTB	1	133	Male	X
825	CTB	1	100	Male	X
830	CTB	1	144	Male	X
831	CTB	1	102	Male	X
832	CTB	1	133	Male	X
2239	CTB	3	370	Male	X
2256	CTB	3	390	Male	X
2418	CTB	3	390	Female	X
2430	CTB	3	390	Male	X
2453	CTB	3	390	Male	X
2504	CTB	3	390	Male	X
2536	CTB	3	390	Female	X
2538	CTB	3	390	Female	X
2554	CTB	3	390	Female	X
2567	CTB	3	390	Female	X
2757	CTB	3	392	Male		X
1026	EVT	1	106	Male	X
1087	EVT	1	135	Male	X
1089	EVT	1	121	Male	X
1094	EVT	1	146	Male	X
1096	EVT	1	114	Female	X
1097	EVT	1	112	Female	X
1099	EVT	1	140	Female	X
951	EVT	1	111	Female	X
970	EVT	1	106	Female	X
977	EVT	1	114	Male	X
2342	EVT	3	392	Male	X
2656	EVT	3	393	Female	X
2667	EVT	3	392	Female	X
2700	EVT	3	394	Female	X
2701	EVT	3	390	Male	X
2706	EVT	3	406	Male	X
2757	EVT	3	392	Male		X
2757	UC-MSC	3	392	Male		X
1386	EVT	1	86	Female					X
1386	CTB	1	86	Female					X
1391	EVT	1	100	Female					X
1391	CTB	1	100	Female					X (poor quality – dropped)
2754	EVT	3	391	Female			X	X	X
2754	CTB	3	391	Female			X	X	X
2754	UC-MSC	3	391	Female			X	X	X
2771	EVT	3	391	Male			X	X	X
2771	CTB	3	391	Male			X	X	X
2771	UC-MSC	3	391	Male			X	X	X
2834	EVT	3	373	Female			X	X	X
2834	CTB	3	373	Female			X	X	X
2834	UC-MSC	3	373	Female			X	X	X
1389	EVT	1	136	Unknown			X
1389	CTB	1	136	Unknown			X
1383	EVT	1	90	Unknown			X
1383	CTB	1	90	Unknown			X
1048	TSC	1	62	Female			Day 0 & Day 5/EVT-differentiated
1049	TSC	1	61	Female			Day 0 & Day 5/EVT-differentiated
1270-C	TSC	1	60	Male			Day 0 & Day 5/EVT-differentiated
